# Supplementary material
Source: Research Square preprint supplement (doi:10.21203/rs.3.rs-9879260/v1)

**Supplementary Table 1.** PCR primers used for DHPV detection and sequencing

| Primers | Sequence (5′**-**3′) | Reference |
| --- | --- | --- |
| F1 | CTCGATGAGGAGAGTTATGGACTT | Kim et al. (2024) |
| R1 | CTATCATGAACTGCAGCACTTATA |
| F2 | CAAATTTGCACAGTGGTTGT |
| R2 | CTCAAACAGCGCGTCATAAA |
| F3 | GGACAGTAACAGCGGGAAGA |
| R3 | AAAACCACTTCGACCACTCG |
| F4 | TTGGCAAGCATGCAGTATGT |
| R4 | TCTTCACCAAGGGTCTGTCC |
| F5 | CCAGACCCAAAGGGTAATGA |
| R5 | TTCCCCTCATTAGCTGGTGT |
| 1414F | GTTAGGAATGGAAAGATGTGT | Jeeva et al. (2012) |
| 1750R | CTCCAATAAAATGTGTAAATGAGG |
| 3510F | ATTACTTTACTGGCGGCGATAG | Lee et al. (2022) |
| 5395R | AGTCTGTTACTCTTCATGGACC |
| 5137F | ACGACATGAACCAGACAAAAGTCACATCAG |
| 6235R | TCTGAAGGGTAAACCACGC |

**Supplementary Fig. 1.** Genome map of Thai Ⅳ (containing ORF 2, ORF 1, and ORF 3)
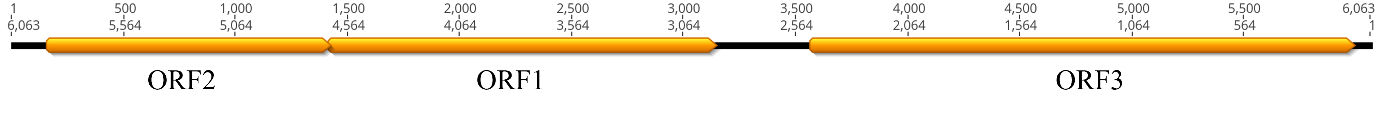

Supplement: Supplementary file 1 [file 3c00468968ad39a5fbe56d2f.docx]
